# Supplementary material
Source: PubMed Central journal article supplement (PMC3966210)
Supplement: NIHMS556610-supplement-125_2013_3116_MOESM2_ESM.pdf [file NIHMS556610-supplement-125_2013_3116_MOESM2_ESM.pdf]

**ESM Table 1** Characteristics of non-diabetic donors (1-19) used for flow cytometry

| Patient Number | Gender | Age | BMI   | GSIS <sup>a</sup><br>(First/second) | Number of CD45 <sup>+</sup><br>cells/1000 IEQ |
|----------------|--------|-----|-------|-------------------------------------|-----------------------------------------------|
| 1              | F      | 24  | 38.1  | ND                                  | ND                                            |
| 2              | M      | 40  | 28.7  | ND                                  | ND                                            |
| 3              | M      | 53  | 29.4  | ND                                  | ND                                            |
| 4              | M      | 54  | 25    | 2.23                                | 2.4x10 <sup>5</sup>                           |
| 5              | M      | 28  | 36.3  | ND                                  | 0.7x10 <sup>5</sup>                           |
| 6              | F      | 47  | 34.4  | 1.5                                 | 4.2x10 <sup>5</sup>                           |
| 7              | F      | 49  | 33.1  | 2.11                                | 6.9 x10 <sup>5</sup>                          |
| 8              | F      | 46  | 30.5  | 2.92                                | 6.0 x10 <sup>5</sup>                          |
| 9              | M      | 39  | 33    | 2.61                                | ND                                            |
| 10             | M      | 54  | 28.56 | 2.96                                | 0.4 x10 <sup>5</sup>                          |
| 11             | F      | 37  | 18.7  | ND                                  | 0.1 x10 <sup>5</sup>                          |
| 12             | M      | 56  | 26.7  | 2.51                                | 16 x10 <sup>5</sup>                           |
| 13             | M      | 34  | 21    | 1.38                                | 1.4 x10 <sup>5</sup>                          |
| 14             | F      | 70  | 26.8  | 1.78                                | 0.6 x10 <sup>5</sup>                          |
| 15             | M      | 62  | 18.1  | ND                                  | 0.5 x10 <sup>5</sup>                          |
| 16             | M      | 47  | 33.1  | ND                                  | 1.4 x10 <sup>5</sup>                          |
| 17             | M      | 16  | 21.5  | ND                                  | 0.7 x10 <sup>5</sup>                          |
| 18             | M      | 31  | 29.9  | 1.77                                | 0.9 x10 <sup>5</sup>                          |
| 19             | M      | 51  | 25.9  | 1.54                                | 1.1 x10 <sup>5</sup>                          |

ND: not done.

<sup>a</sup>First/second peak of glucose stimulated insulin secretion (GSIS).
