# Supplementary material
Source: PubMed Central journal article supplement (PMC3966210)
Supplement: NIHMS556610-supplement-125_2013_3116_MOESM3_ESM.pdf [file NIHMS556610-supplement-125_2013_3116_MOESM3_ESM.pdf]

**ESM Table 2** Characteristics of type 2 diabetic donors used for flow cytometry (20-34) and perfusion (20 -36)

| Patient Number  | Gender | Age | BMI  | GSIS <sup>a</sup><br>(First/second) | Number of CD45 <sup>+</sup><br>cells/1000 IEQ | Medical history <sup>b</sup>                                                      |
|-----------------|--------|-----|------|-------------------------------------|-----------------------------------------------|-----------------------------------------------------------------------------------|
| 20              | F      | 38  | 37.8 | 2.15<br>(Fig. 1aG)                  | ND                                            | DM x 2 yr, A <sub>1C</sub> 5.6%<br>(37.7 mmol/mol) <sup>c</sup> ,<br>on Metformin |
| 21              | F      | 56  | 28.9 | ND                                  | ND                                            | DM x 4 yr, on oral<br>medication                                                  |
| 22              | F      | 54  | 52.7 | 1.45<br>(Fig. 1aK)                  | ND                                            | Untreated DM                                                                      |
| 23              | M      | 43  | 27   | 1.33<br>(Fig. 1aQ)                  | ND                                            | DM x 2 yr, A <sub>1C</sub> 11% (96.7<br>mmol/mol), not on insulin                 |
| 24              | F      | 54  | 30   | 1.40<br>(Fig. 1aL)                  | 2 x10 <sup>5</sup>                            | DM 6 to 10 yr, A <sub>1C</sub> 6.6%<br>(48.6 mmol/mol)                            |
| 25              | M      | 44  | 33.5 | 1.36<br>(Fig. 1aM)                  | 0.5 x10 <sup>5</sup>                          | DM x 6 yr,<br>A <sub>1C</sub> 9.3% (78.1<br>mmol/mol), on metformin               |
| 26              | M      | 56  | 35.1 | 1.00<br>(Fig. 1aP)                  | 0.2 x10 <sup>5</sup>                          | DM x 5 yr                                                                         |
| 27 <sup>d</sup> | F      | 55  | 24   | 1.20<br>(Fig. 1aN)                  | 0.5 x10 <sup>5</sup>                          | A <sub>1C</sub> 6.4% (46.4<br>mmol/mol)                                           |
| 28 <sup>e</sup> | M      | 49  | 28.2 | 2.14                                | 2.1 x10 <sup>5</sup>                          | A <sub>1C</sub> 6.7% (49.7<br>mmol/mol)                                           |
| 29              | F      | 54  | 48.5 | 2.24                                | 0.22 x10 <sup>5</sup>                         | DM x 6 to10 yr on insulin                                                         |
| 30              | M      | 55  | 28   | 1.95<br>(Fig. 1aH)                  | 1.3 x10 <sup>5</sup>                          | DM x 12 yr, diet<br>controlled after gastric<br>bypass 8 yr ago                   |
| 31              | M      | 58  | 48.9 | 1.77<br>(Fig. 1aJ)                  | 1.1 x10 <sup>5</sup>                          | DM less than 5 yr                                                                 |
| 32              | F      | 43  | 33   | 2.2<br>(Fig. 1aF)                   | 1.1 x10 <sup>5</sup>                          | DM < 5 yr on insulin                                                              |
| 33              | F      | 54  | 37.3 | 1.19                                | ND                                            | A <sub>1C</sub> 6.6% (48.6<br>mmol/mol)                                           |
| 34 <sup>d</sup> | F      | 37  | 38.4 | ND                                  | ND                                            | A <sub>1C</sub> 6.2% (44.3<br>mmol/mol)                                           |
| 35              | M      | 53  | 30.9 | 1.94<br>(Fig. 1aI)                  | ND                                            | DM < 1 yr on insulin                                                              |
| 36              | M      | 48  | 28.6 | 1.35<br>(Fig. 1aO)                  | ND                                            | A <sub>1C</sub> 13.3% (122<br>mmol/mol)                                           |

ND; not done.

<sup>a</sup>First/second peak of glucose stimulated insulin secretion (GSIS).

<sup>b</sup>DM; diabetes, yr; year, A<sub>1C</sub>; hemoglobin A<sub>1C</sub>. Duration of diabetes based on medical history may not include period of undiagnosed disease that varies depending on frequency of medical visit in an individual donor. A<sub>1C</sub> is taken after a terminal event and interfering factors such as transfusion cannot be ruled out.

<sup>c</sup>A<sub>1C</sub> values in International Federation of Clinical Chemistry and Laboratory Medicine (IFCC) units (mmol/mol) are provided in parentheses.

<sup>d</sup>Prediabetes. These data are excluded from the statistical comparisons between non-DM and T2DM groups in Fig. 1b-c, f, Fig. 2a-f, and Fig. 3a-d.

<sup>e</sup>Presumptive postmortem diagnosis of type 2 diabetes.
