# Supplementary material
Source: PubMed Central journal article supplement (PMC3966210)
Supplement: NIHMS556610-supplement-125_2013_3116_MOESM4_ESM.pdf [file NIHMS556610-supplement-125_2013_3116_MOESM4_ESM.pdf]

**Supplementary Table 3. Antibodies used for flow cytometry**

| <b>Antigen</b> | <b>Fluorochrome</b>            | <b>Clone</b>           |
|----------------|--------------------------------|------------------------|
| CD3            | PE                             | UCHT1                  |
| CD11b          | Pacific Blue                   | ICRF44                 |
| CD11c          | APC                            | B-ly6                  |
| CD20           | Pacific Blue                   | 2H7                    |
| CD44           | FITC                           | G4-26                  |
| CD45           | eFluor 450, PerCP              | H130                   |
| CD45RA         | PE Cy7                         | HI100                  |
| CD69           | APC                            | FN50                   |
| CD86           | FITC                           | 2331 (FUN-1)           |
| CD235a         | FITC                           | GA-R2 (HIR2)           |
| HPa2           | Alexa Fluor 647<br>(Secondary) | DHIC2-2B4 <sup>a</sup> |
| HPi2           | PE (Secondary)                 | HIC1-2B4 <sup>a</sup>  |

a: Obtained from Oregon Health & Science University. All the rest of antibodies are from BD Pharmingen
