# Supplementary material
Source: PubMed Central journal article supplement (PMC3966210)

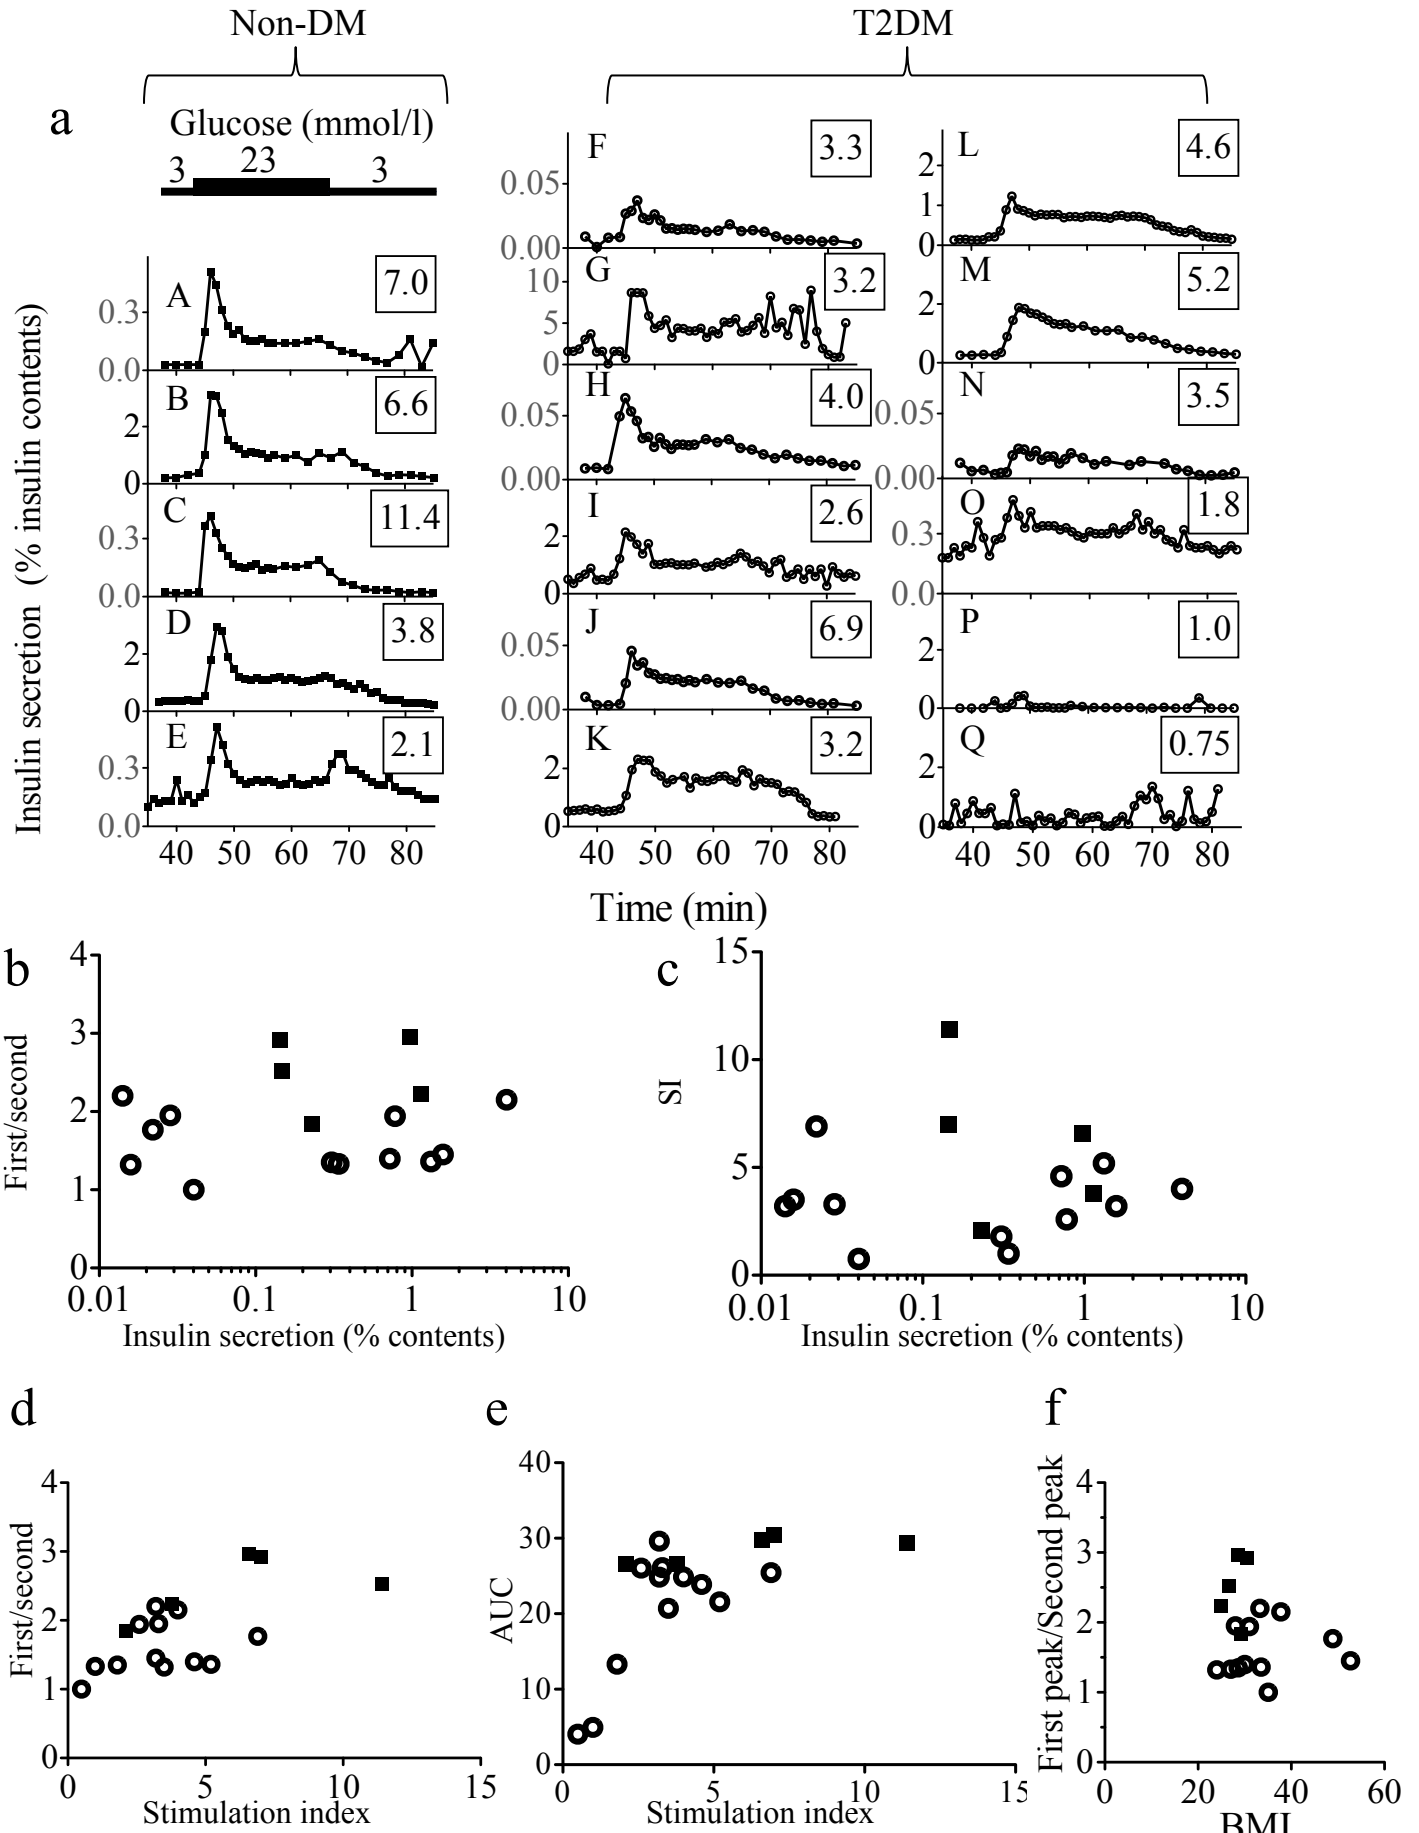

ESM Fig. 1

Supplement: NIHMS556610-supplement-125_2013_3116_MOESM5_ESM.pdf [file NIHMS556610-supplement-125_2013_3116_MOESM5_ESM.pdf]

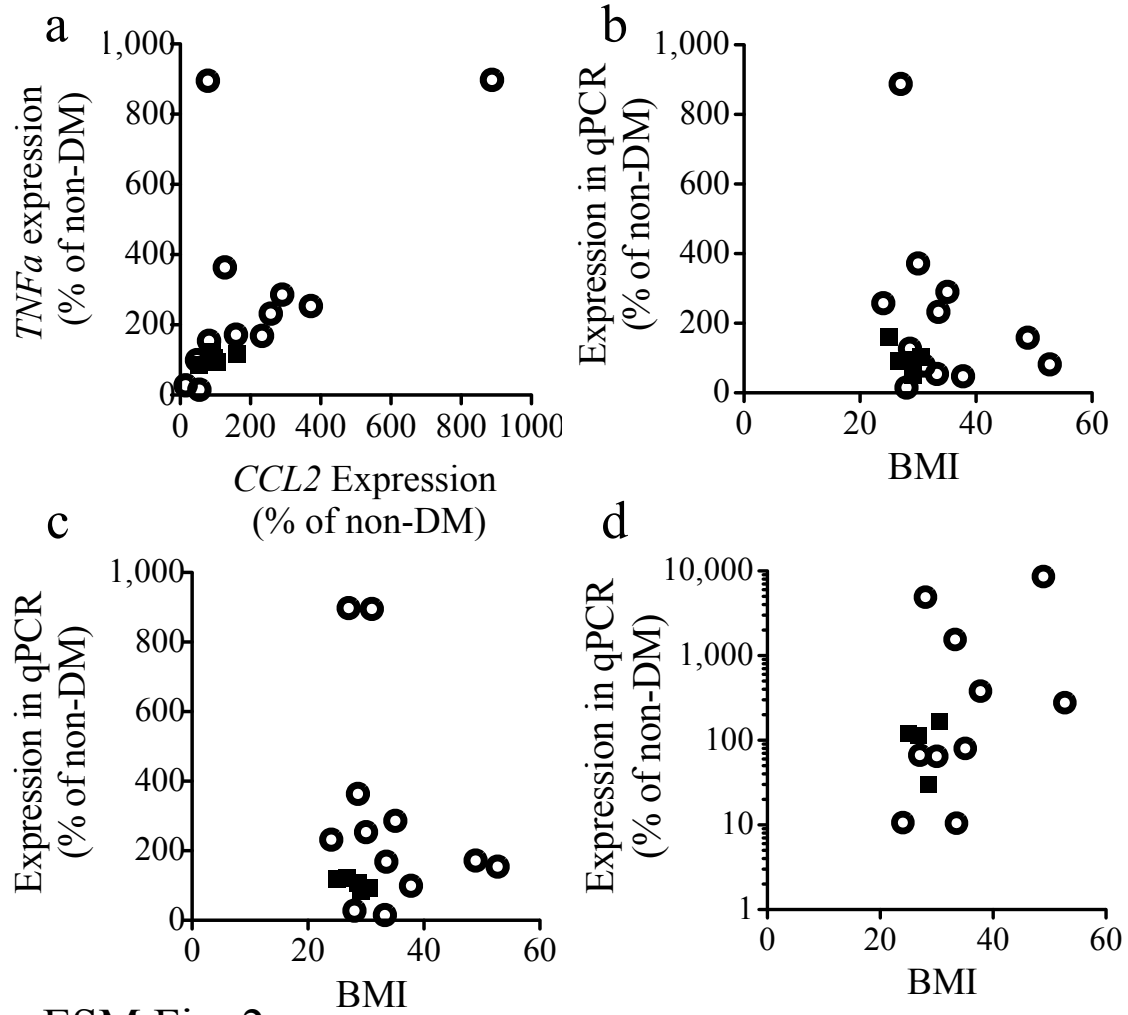

ESM Fig. 2

Supplement: NIHMS556610-supplement-125_2013_3116_MOESM6_ESM.pdf [file NIHMS556610-supplement-125_2013_3116_MOESM6_ESM.pdf]

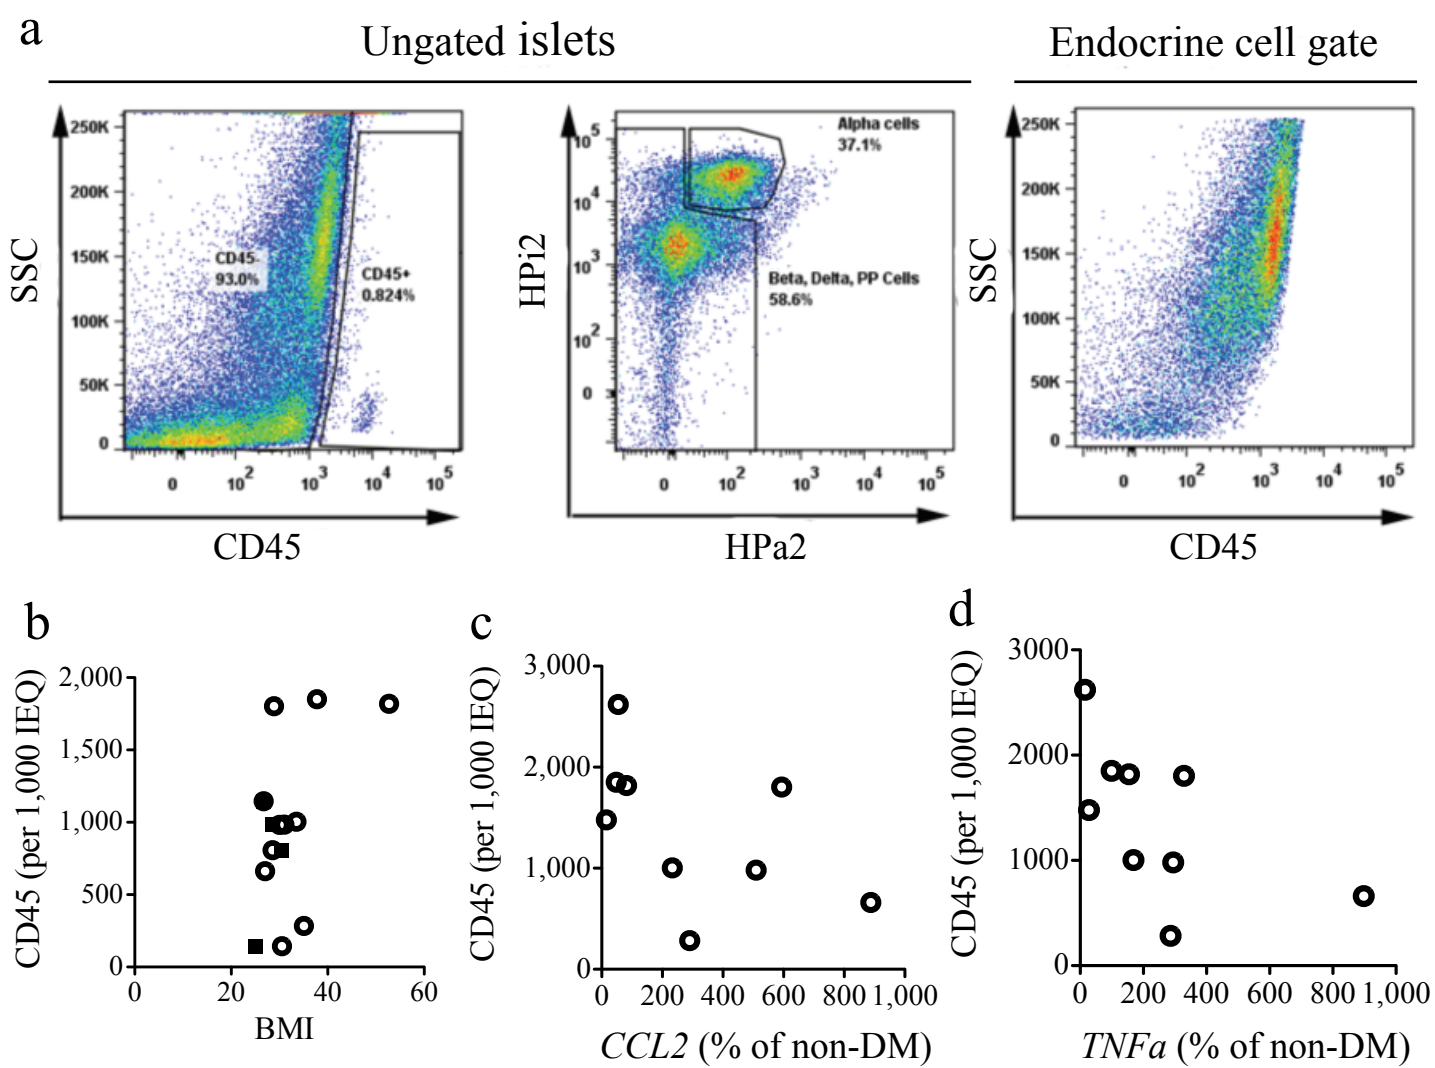

ESM Fig. 3

Supplement: NIHMS556610-supplement-125_2013_3116_MOESM7_ESM.pdf [file NIHMS556610-supplement-125_2013_3116_MOESM7_ESM.pdf]

**a**Non-DM Islets  
Pt 11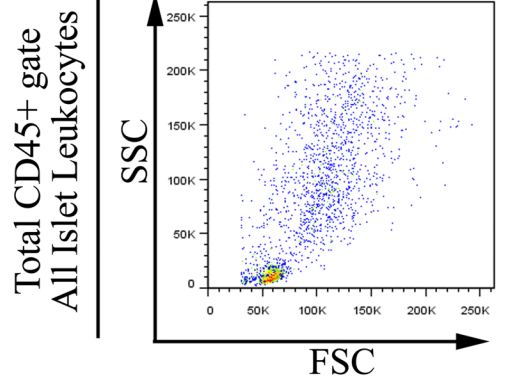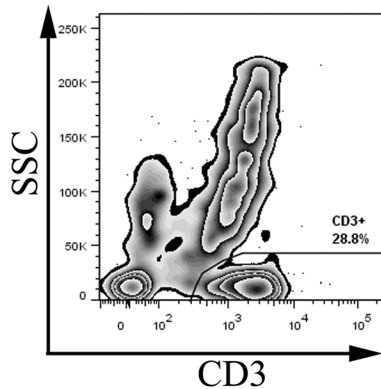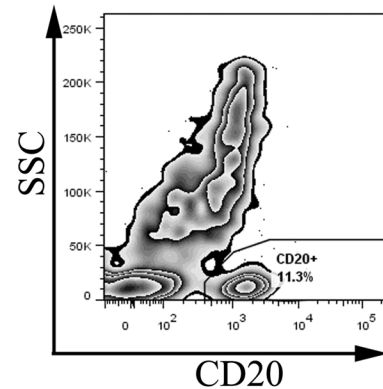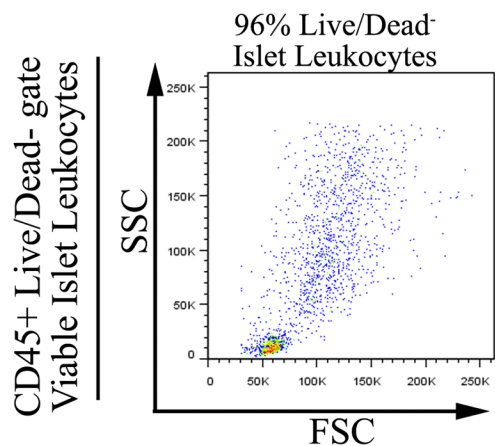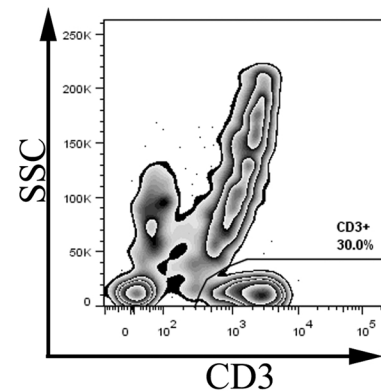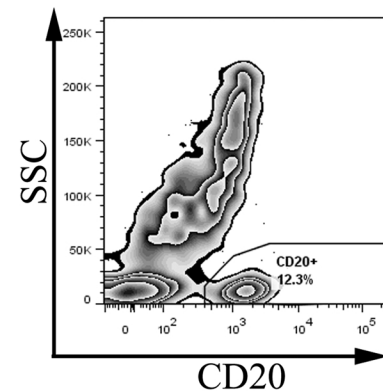**b**T2DM Islets  
Pt 21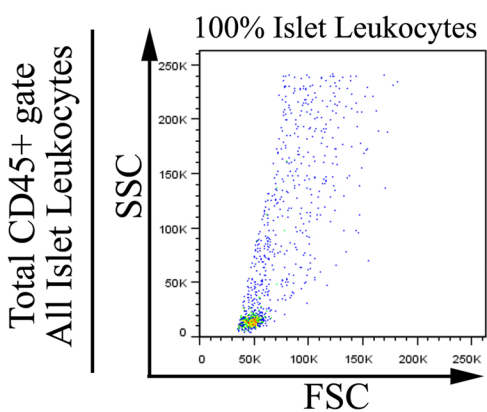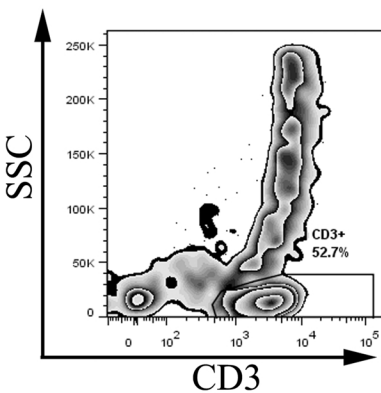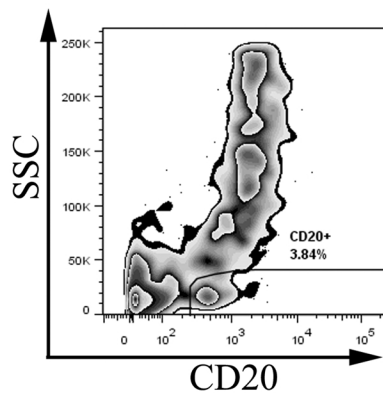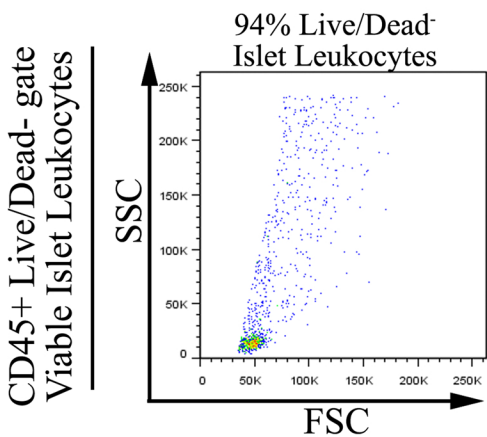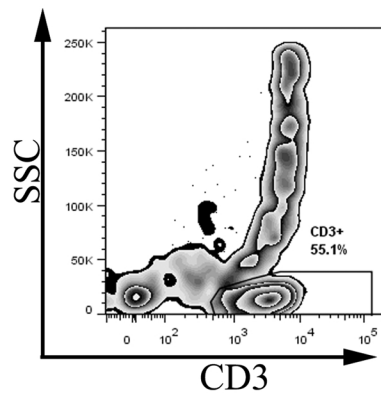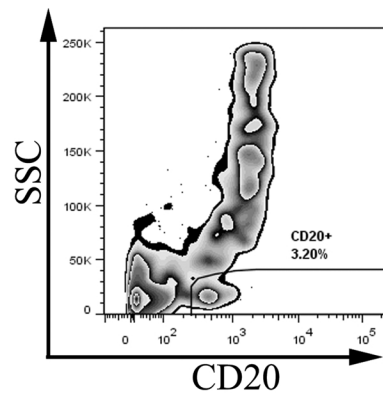

Supplement: NIHMS556610-supplement-125_2013_3116_MOESM8_ESM.pdf [file NIHMS556610-supplement-125_2013_3116_MOESM8_ESM.pdf]

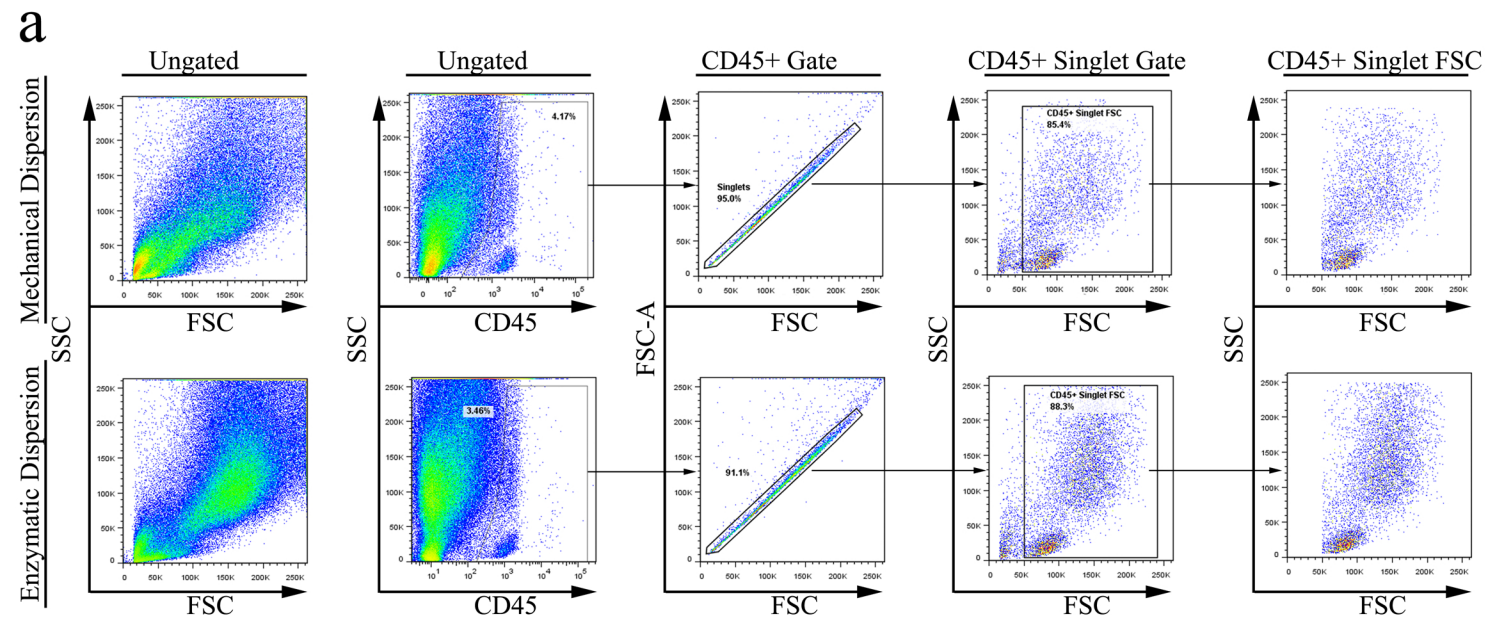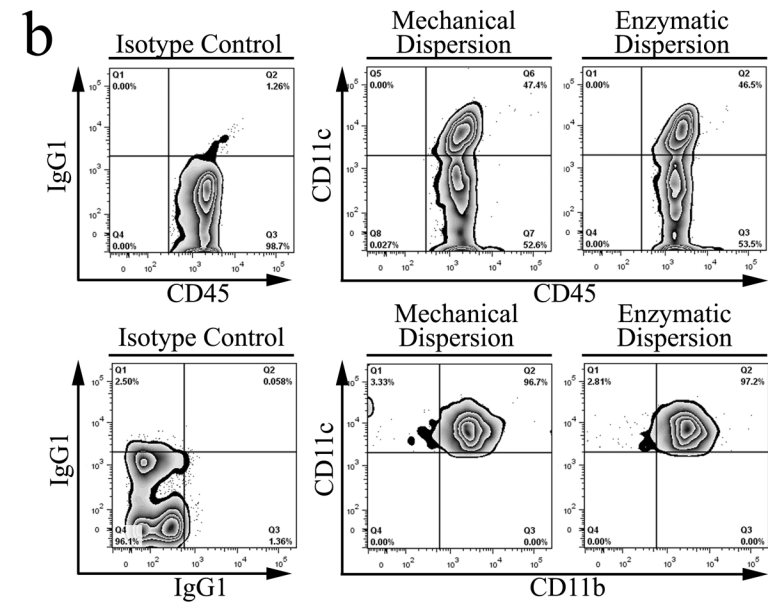

Supplement: NIHMS556610-supplement-125_2013_3116_MOESM9_ESM.pdf [file NIHMS556610-supplement-125_2013_3116_MOESM9_ESM.pdf]
